# Supplementary material
Source: Springer Nature journal article supplement (https://www.springermedizin.de/resource/supplementary/12981_2009_117_MOESM4_ESM.pdf/9603860)
Supplement: MOESM4 [file 9603860]

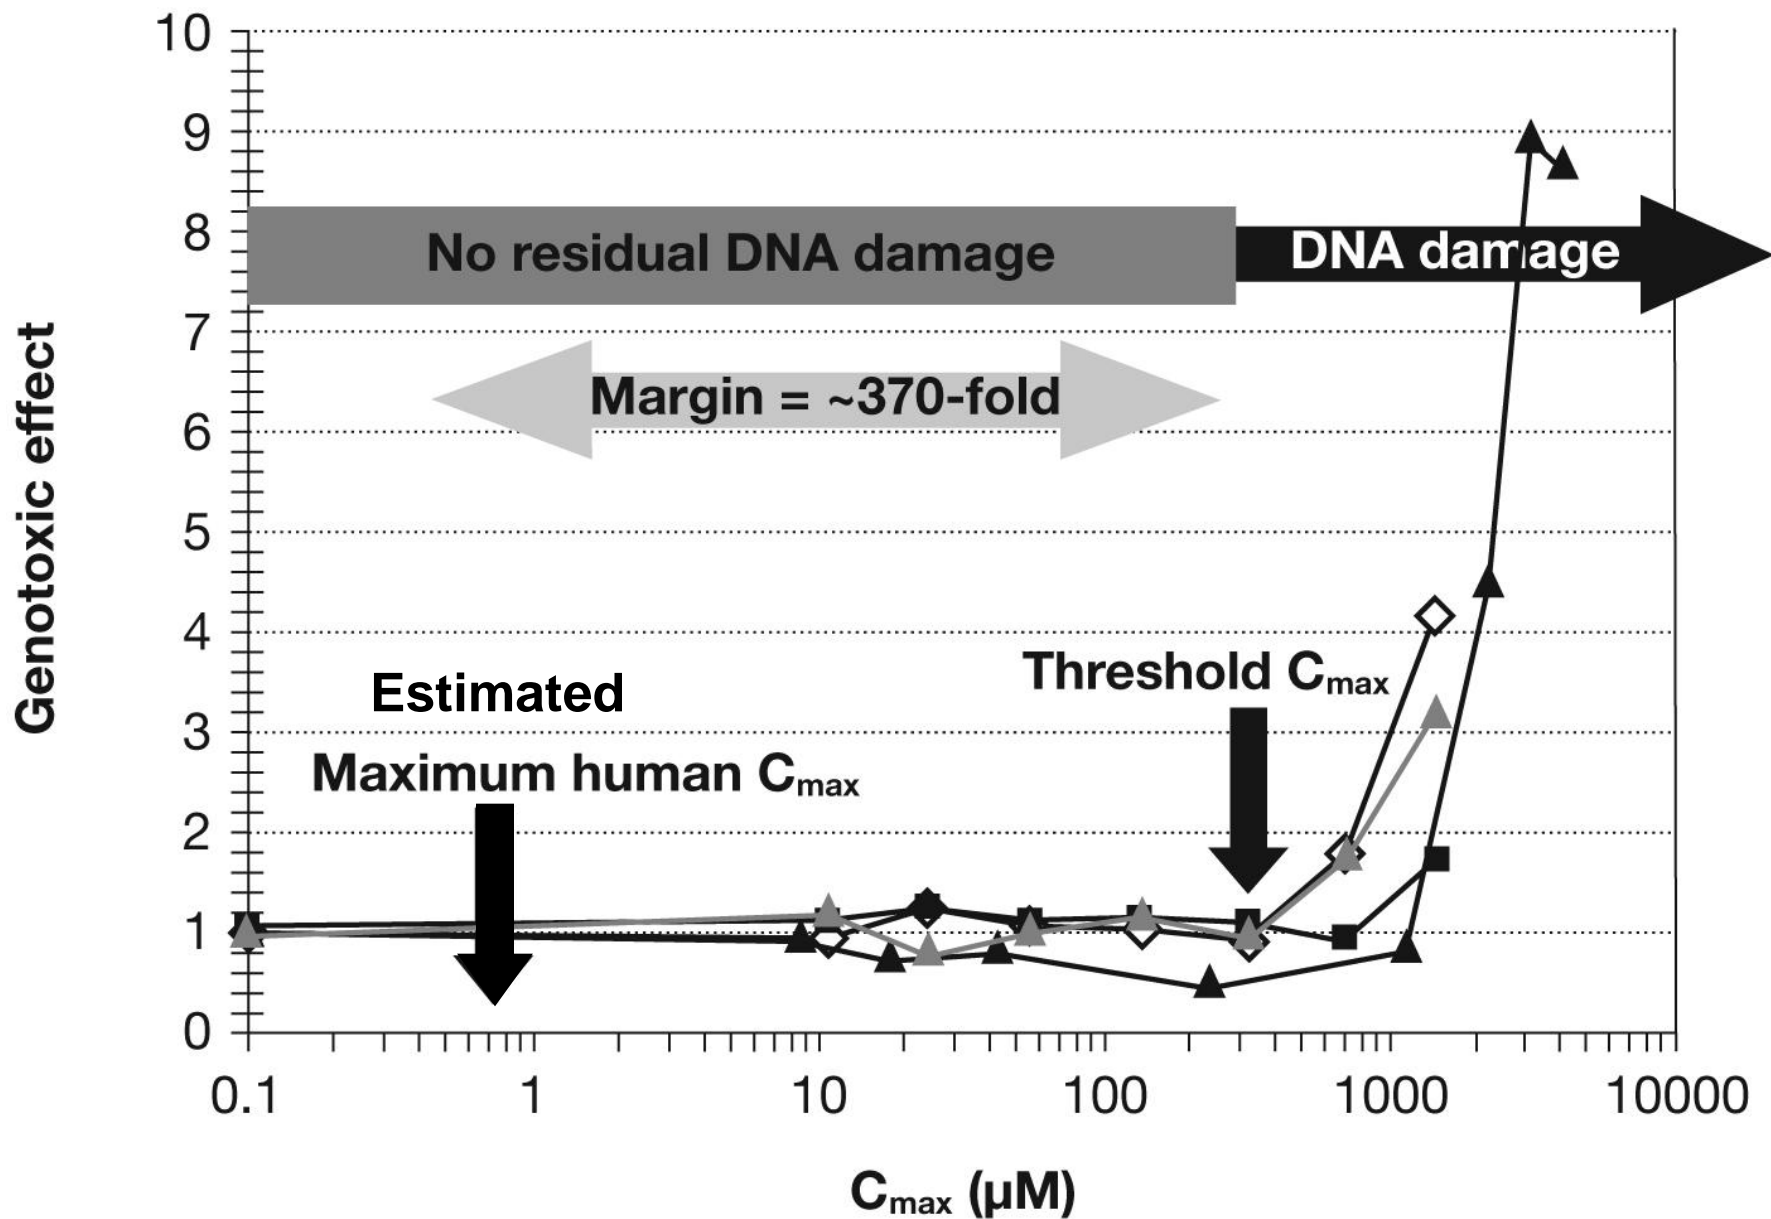

◇ Bone marrow; gene mutation

■ Liver; gene mutation

▲ GI tract; gene mutation

▲ Bone marrow; micronucleus
